# Supplementary material
Source: Royal Society of Chemistry journal article supplement (doi:10.1039/d6nr00335d)
Supplement: d6nr00335d1.pdf [file d6nr00335d1.pdf]

### Supplementary Information for Microfluidic-assisted Self-assembly of Information-bearing Oligomers

Davood Khoeini, Samuel C. Leguizamon, Adrian Neild, Timothy F. Scott

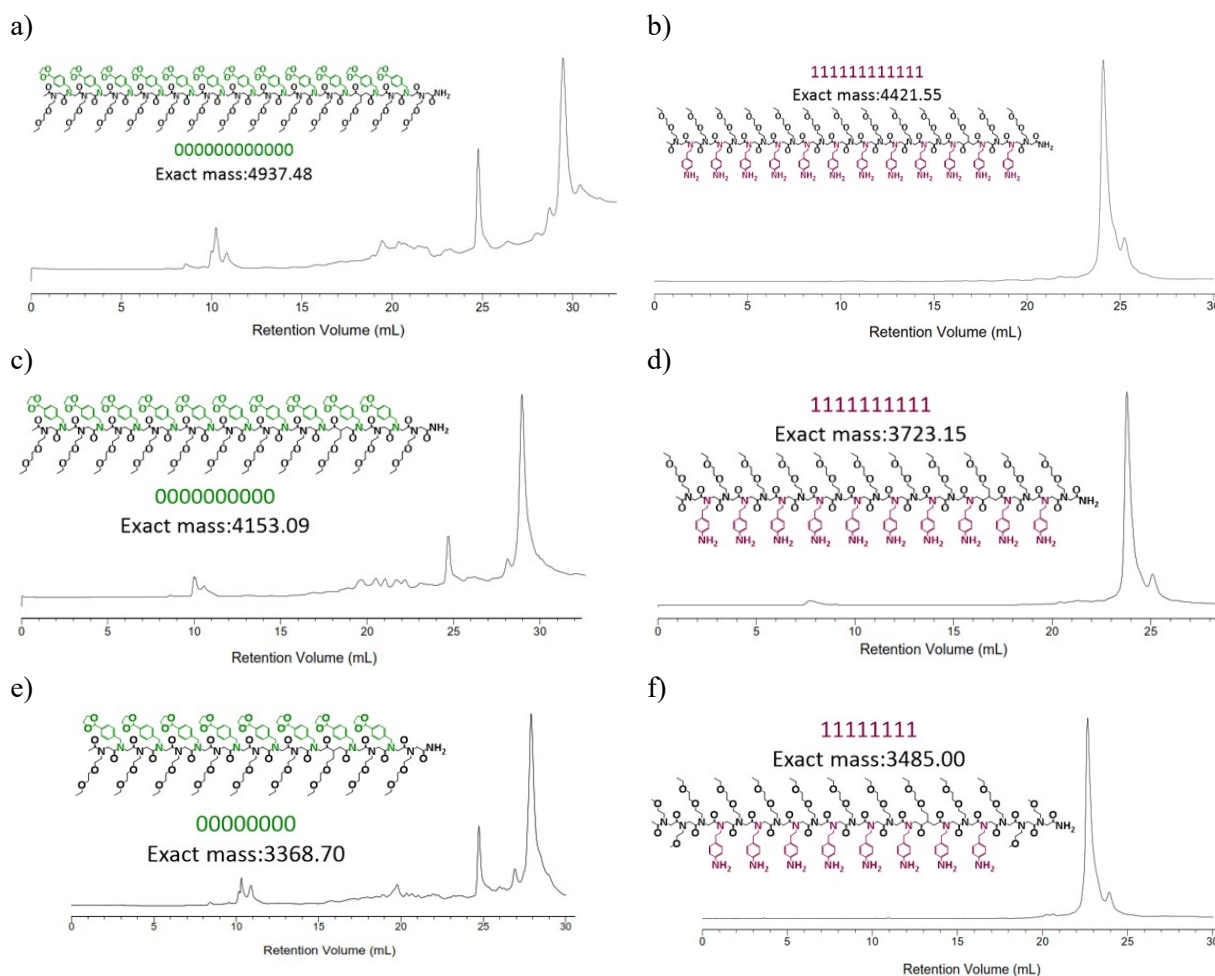

**Supplementary Figure 1** a-f, RP-HPLC traces of purified oligo(peptoid) sequences used for the self-assembly of imine-based molecular ladders through microfluidics.

a, Neee(NpalNeee)12; b, Neee(NamNeee)12; c, Neee(NpalNeee)10; d, Neee(NamNeee)10; e, Neee(NpalNeee)8;  
f, Nme2Neee(NamNeee)8Nme2.

a)

b)

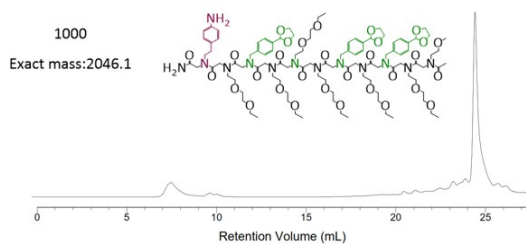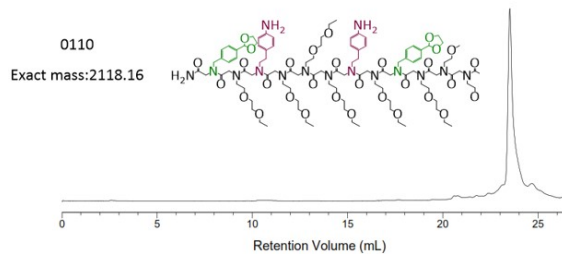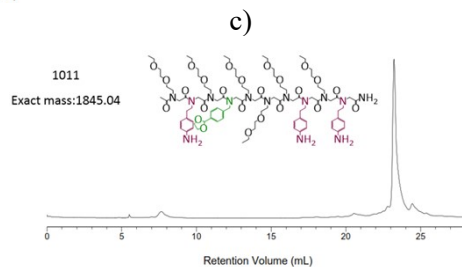

**Supplementary Figure 2** a-c, RP-HPLC traces of purified oligo(peptoid) sequences used for the self-assembly of imine-based three-way junction nanostructures through microfluidics.

a, NamNeeeeeNpalNeeee3(NpalNeeee)2 Nme; b, (NpalNeeeeNamNeeee)Neeee(NamNeeeeNpalNeeee)Nme2

c, (NamNeeee)2Neeee2NpalNeeeeNamNeeee

a)

b)

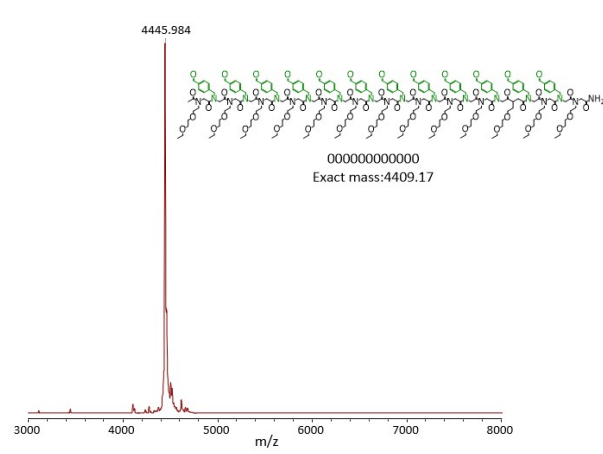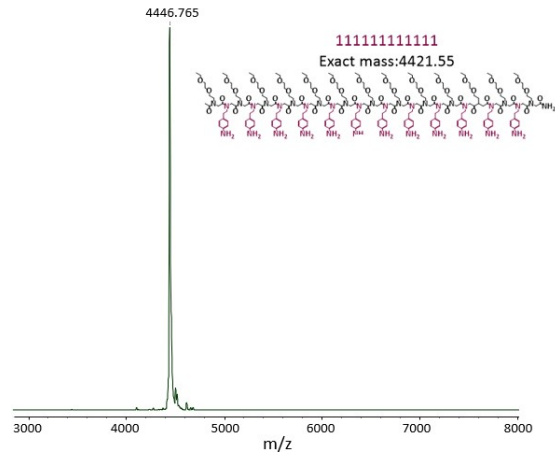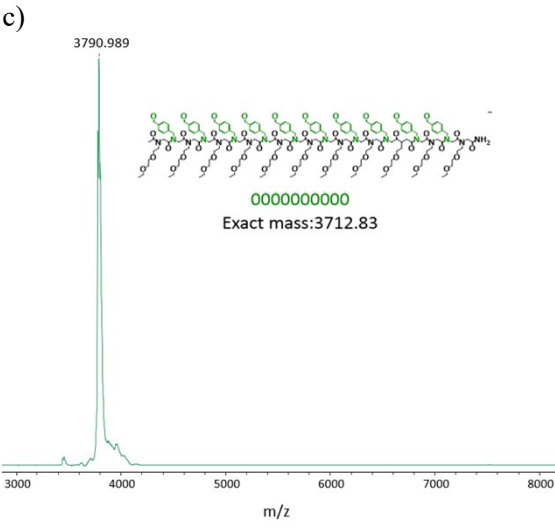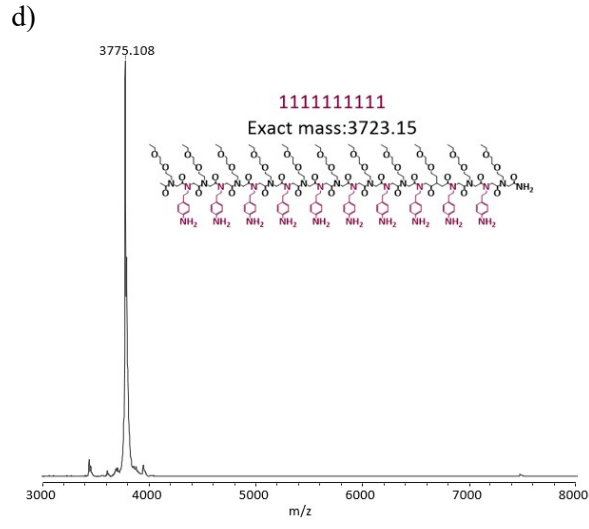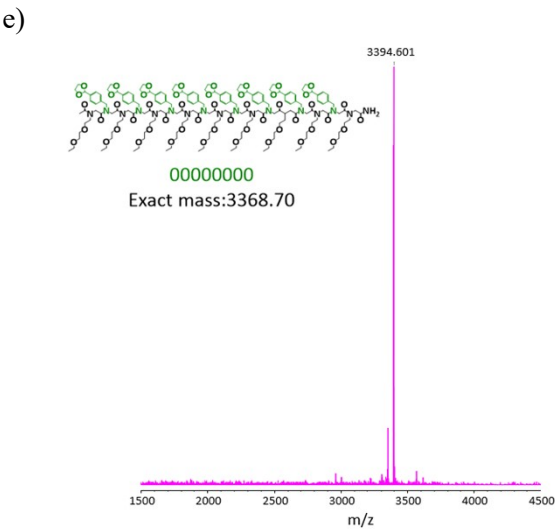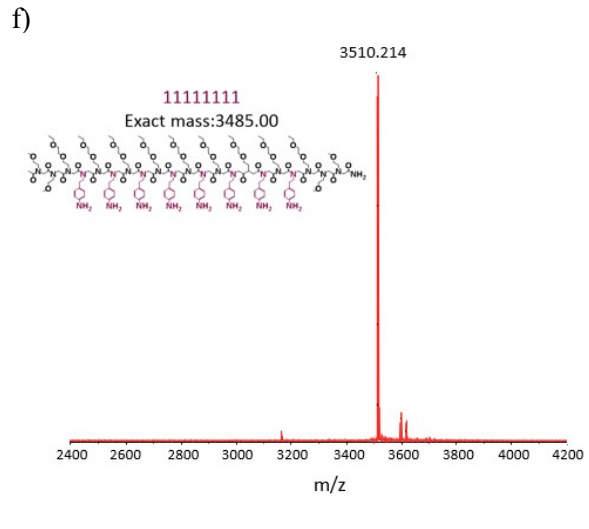

**Supplementary Figure 2 a-f**, MALDI mass spectra of purified oligo(peptoid) sequences used for the self-assembly of imine-based molecular ladders through microfluidics.

a, Neee(NpalNeee)12; b, Neee(NamNeee)12; c, Neee(NpalNeee)10; d, Neee(NamNeee)10; e, Neee(NpalNeee)8;

f, Nme2Neee(NamNeee)8Nme2.
